# Supplementary material for: Adverse outcomes after arthroscopic partial meniscectomy: a study of 700 000 procedures in the national Hospital Episode Statistics database for England
Source: PubMed Central journal article supplement (PMC6238020; doi:10.1016/s0140-6736(18)31771-9), 2018-11-17
Supplement: mmc1.pdf [file mmc1.pdf]

# THE LANCET

## Supplementary appendix

This appendix formed part of the original submission and has been peer reviewed.  
We post it as supplied by the authors.

Supplement to: Abram SGF, Judge A, Beard DJ, Price AJ. Adverse outcomes after arthroscopic partial meniscectomy: a study of 700 000 procedures in the national Hospital Episode Statistics database for England. *Lancet* 2018; published online September 24. [http://dx.doi.org/10.1016/S0140-6736\(18\)31269-8](http://dx.doi.org/10.1016/S0140-6736(18)31269-8).

## Appendix: Previous studies of knee arthroscopy risks

| Reference                    | Cohort (country)              | Open procedures (e.g. ACLr) excluded? | Procedures n             | Period (days) | DVT n (%)    | PE n (%)    | VTE n (%)   | MI n (%)   | CVA n (%)  | Reoperation n (%) | Infection n (%)                   | Death n (%) |
|------------------------------|-------------------------------|---------------------------------------|--------------------------|---------------|--------------|-------------|-------------|------------|------------|-------------------|-----------------------------------|-------------|
| Murphy 2016 <sup>1</sup>     | Single centre (USA)           | No                                    | 2,783                    | 30            |              |             | 7 (0.25%)   |            |            |                   |                                   |             |
| Shah 2017 <sup>2</sup>       | National database (USA)       | Unclear                               | 45,943                   | 30            |              |             |             | - (0.05%)  |            |                   |                                   |             |
| Cancienne 2017 <sup>3</sup>  | Insurer database (USA)        | Unclear                               | 1. 100,399<br>2. 629,841 | 90            |              |             |             |            |            |                   | 1. 250 (0.25%)<br>2. 1755 (0.28%) |             |
| Maletis 2012 <sup>4</sup>    | Insurer database (USA)        | No                                    | 20,770                   | 90            | 51 (0.25%)   | 35 (0.17%)  | 84 (0.40%)  | -          | -          | -                 | -                                 | 9 (0.04%)   |
| Hetsroni 2011 <sup>5</sup>   | Regional database (USA)       | No                                    | 418,323                  | 90            | -            | 117 (0.03%) | -           | -          | -          | -                 | -                                 | -           |
| Yeranosian 2013 <sup>6</sup> | Insurer database (USA)        | No                                    | 432,038                  | 30            | -            | -           | -           | -          | -          | -                 | 638 (0.15%)                       | -           |
| Bohensky 2014 <sup>7</sup>   | Regional database (Australia) | Yes                                   | 166,770                  | 30            | 444 (0.27%)  | 129 (0.08%) | 573 (0.34%) | -          | -          | 305 (0.18%)       | 141 (0.08%)                       | 23 (0.01%)  |
| Hame 2012 <sup>8</sup>       | Insurer database (USA)        | No                                    | 314,578 (age >65)        | 90            | 2507 (0.80%) | 982 (0.31%) |             | -          | -          | -                 | 1107 (0.35%)                      | -           |
| Jameson 2011 <sup>9</sup>    | National database (UK)        | No                                    | 301,701                  | 30/90         | 369 (0.12%)  | 230 (0.08%) | 580 (0.19%) | 48 (0.02%) | 52 (0.02%) | 1033 (0.34%)      | -                                 | 47 (0.02%)  |

ACLR = anterior cruciate ligament reconstruction; \* - = not reported.

### References:

- 1 Murphy RF, Heyworth B, Kramer D, *et al.* Symptomatic Venous Thromboembolism After Adolescent Knee Arthroscopy. *J Pediatr Orthop* 2016; **0**: 1–5.
- 2 Shah CK, Keswani A, Boodaie BD, Yao DH, Koenig KM, Moucha CS. Myocardial Infarction Risk in Arthroplasty vs Arthroscopy: How Much Does Procedure Type Matter? *J Arthroplasty* 2017; **32**: 246–51.
- 3 Cancienne JM, Mahon HS, Dempsey IJ, Miller MD, Werner BC. Patient-related risk factors for infection following knee arthroscopy: An analysis of over 700,000

- patients from two large databases. *Knee* 2017; **24**: 594–600.
- 4 Maletis GB, Inacio MC, Reynolds S, Funahashi TT. Incidence of Symptomatic Venous Thromboembolism After Elective Knee Arthroscopy. *J Bone Jt Surgery-American Vol* 2012; **94**: 714–20.
  - 5 Hetsroni I, Lyman S, Do H, Mann G, Marx RG. Symptomatic pulmonary embolism after outpatient arthroscopic procedures of the knee: the incidence and risk factors in 418,323 arthroscopies. *J Bone Joint Surg Br* 2011; **93**: 47–51.
  - 6 Yeranorian MG, Petrigliano FA, Terrell RD, Wang JC, McAllister DR. Incidence of postoperative infections requiring reoperation after arthroscopic knee surgery. *Arthrosc - J Arthrosc Relat Surg* 2013; **29**: 1355–61.
  - 7 Bohensky MA, Ademi Z, DeSteiger R, *et al*. Quantifying the excess cost and resource utilisation for patients with complications associated with elective knee arthroscopy: A retrospective cohort study. *Knee* 2014; **21**: 491–6.
  - 8 Hame SL, Nguyen V, Ellerman J, Ngo SS, Wang JC, Gamradt SC. Complications of arthroscopic meniscectomy in the older population. *Am J Sports Med* 2012; **40**: 1402–5.
  - 9 Jameson SS, Downen D, James P, *et al*. The burden of arthroscopy of the knee: a contemporary analysis of data from the English NHS. *J Bone Joint Surg Br* 2011; **93**: 1327–33.
